# Supplementary material
Source: Elsevier journal article supplement (https://www.sciencedirect.com/science/article/pii/S0213911121003393)
Supplement: mmc1 [file S0213911121003393:mmc1.doc]

**Apéndice**

**Tabla I**

Codificación e ítems de las diferentes dimensiones de la versión reducida de la escala EPRES

| **Dimensión (*Items*)** | **Opciones de respuesta** | **Puntuación** |
| --- | --- | --- |
| **Temporalidad** |  |  |
| *1. Duración del contrato actual* | 0: contrato permanente | (0 a 8)*4/8 |
|  | 1: 1 año o más |
|  | 2: temporal, sin fecha de término |
|  | 3: 6 a 12 meses |
|  | 4: menos de 6 meses |
| *2. ¿Cuánto tiempo en total lleva trabajando para esta empresa?* | 0: más de 10 años |
|  | 1: entre 5 y 10 años |
|  | 2: de 2 a 5 años |
|  | 3: de 6 meses a 2 años |
|  | 4: menos de 6 meses |
| **Salario** |  |  |
| *3. ¿Su salario le permite cubrir gastos imprevistos de importancia?* | 0: siempre | (0 a 4)*4/4 |
|  | 1: muchas veces |
|  | 2: algunas veces |
|  | 3: solo algunas veces |
|  | 4: nunca |
| **Desempoderamiento** |  |  |
| *4. ¿Cómo se decidieron las siguientes condiciones de trabajo en relación a su salario?* | 0: se ajusta estrictamente a lo establecido en el convenio colectivo | (0 a 4)*4/4 |
|  | 1: en mi equipo de trabajo |
|  | 2: acuerdo entre mis superiores y yo |
|  | 3: de forma unilateral, la dirección de mi empresa o mis superiores |
|  | 4: no sé |
| **Vulnerabilidad** |  |  |
| *5. ¿Tiene miedo de reclamar mejores condiciones de trabajo sin verse expuesto a represalias?* | 0: nunca | (0 a 12)*4/12 |
| *6. ¿Está indefenso ante el trato injusto de sus superiores?* | 1: solo algunas veces |
| *7. ¿Le despedirían de su trabajo si no hiciera todo lo que le piden?* | 2: algunas veces |
|  | 3: muchas veces |
|  | 4: siempre |
| **Derechos** |  |  |
| *8. Derecho a indemnización por despido* | 0: sí | (0 a 2)*4/2 |
|  | 1: no |
|  | 2: no sabe |
| **Ejercer derechos** |  |  |
| *9. Hacer los días de fiesta semanales sin problemas* | 0: siempre | (0 a 8)*4/8 |
| *10. Coger un día de permiso por motivos personales* | 1: muchas veces |
|  | 2: algunas veces |
|  | 3: solo algunas veces |
|  | 4: nunca |
|  |  |  |
| **Escala de precariedad laboral EPRES** | (∑ subescalas) / 6 | (0 a 4) |
|  |  |  |
| **Categorización de dimensiones y de EPRES** | Ausencia precariedad: 0 a 1 (inclusive)  Precariedad moderada: >1 a 2 (inclusive)  Precariedad alta: >2 a 4 (inclusive) | |

Fuente: elaboración propia a partir de la tabla incluida en la metodología de la ESCAV.
